# Supplementary material
Source: MDPI journal article supplement (https://www.mdpi.com/2311-7524/7/8/246)
Supplement: s1 [file s1]

>BT126-CDS

ATGACTAATCTTTACCTCACAATCCTTCTCCCTACTTTTCATATTCCTTATCGTTCTCGTCTTATCTCGCCGC  
CGCAACAACCGTCTCCCTCCAGGTCCAAACCCATGGCCCATCATCGGAAACCTCCCTCACATGGGCCCTA  
AACCCCATCAAACACTAGCCGCTATGGTAACACACATACGGACCTATCCTCCACCTACGGCTAGGGTTTCGC  
CGACGTTGTGGTTGCCGCTCTAAATCCGTGGCCGAACAGTTCTTCAAAGTTTCATGATGCCAATTTTCGCTA  
GCCGACCACCTAACTCCGGAGCCAAACACATGGCATATAACTATCAAGATCTTGTCTTTGCGCCTTATGG  
ACAACGATGGAGAATGTTGAGGAAGATTAGTTCTGTTTCATTTATTTTCAGCTAAAGCTCTTGAAGATTTCA  
AACATGTTTCGACAGGAAGAGGTTGGAACACTCATGCGCGAGCTAGCGCGTGCAAACACGAAACCAAGTGA  
ACCTAGGCCAGTTGGTAAACATGTGCGTACTCAACGCCCTTGGACGAGAGATGATCGGACGGCGACTGTT  
CGGCGCCGATGCCGATCACAAGCGGAGGAGTTTCGATCAATGGTCACAGAAATGATGGCTCTCGCCGG  
AGTATTCAACATCGGAGATTTTCGTGCCCCGACTTGATTGTTTAGATTTACAAGGCGTCGCTGGTAAAATG  
AAACGTCTACACAAGAGGTTTCGACGCTTTTCTATCGTCGATCTTGGAAGAGCACGAGGCGATGAAGAAC  
GGTCAGGATCAAAAGCACACGGACATGCTTAGCACTTTAATCTCGCTTAAGGGAACGATTTTGACGGTG  
AGGGTGAACCTCTAACGGATACTGAGATCAAAAGCCTTGCTATTGAACATGTTTACGGCCGAACTGACAC  
GTCAGCAAGTACGGTGGACTGGGCCATAGCTGAATTAATCCGTCACCCGGAATAATGAGAAAAGCCCA  
AGAAGAGCTTGATTCCGTCGTGCGGACGTGGAAGGCCCATTAACGAGTCGGACCTTTCTCAGCTTCCTTAC  
CTTCAGGTAACCCGAACCGGGAACCTCGGATTGTTTGGTTAAGCAATAATATTAACCGGTTTTGGTTTAA  
ACAGGCGGTTATCAAAGAGAATTTAGGCTCCATCCACCAACACCACTCTCGTTACCACACATCGCATCA  
GAGAGCTGTGATCAACGGCTATCATATCCCCAAAGGATCAACCTTTTGACAAACATATGGGCCATAG  
CCCGTGACCCGGACCAATGGACCGACCGTTATCGTTTCGACCCGAGAGATTTTTACCCGGTGGTGAAAA  
AGCCGGCGTTGATGTGAAAGGAAACGACTTCGAGCTTATACCGTTCGGAGCGGGGAGGAGAATCTGCGC  
CGGGTTGAGTTTAGGGCTACGGACGATTACGTTACTGACGGCGACGCTTGTTACGGATTTGAATGGGAA  
CTGGCCCCGAGGAGTTACGCCGGAGAAGCTGAACATGGAGGAGACTTATGGGATTACTCTACAAAGAGCG  
GTTCTTTTGGTTGTGCATCCTAAGCCAAGGTTGGATATGAGTGCTTACGGACTCGGGTCGGCTTAAACCT  
TTGCTTGCGTGACAAGCTAGGTCTTGACCGGTGGAAGGATCCCGGGCCCGTCGACTGCAGAGGCC

>SN60-CDS

ATGACTAATCTTTACCTCACAATCCTTCTCCCTACTTTTCATATTCCTTATCGTTCTCGTCTTATCTCGCCGC  
CGCAACAACCGTCTCCCTCCAGGTCCAAACCCATGGCCCATCATCGGAAACCTCCCTCACATGGGCCCTA  
AACCCCATCAAACACTAGCCGCTATGGTAACACATACGGACCTATCCTCCACCTACGGCTAGGGTTTCGC  
CGACGTTGTGGTTGCCGCTCTAAATCCGTGGCCGAACAGTTCTTCAAAGTTTCATGATGCCAATTTTCGCTA  
GCCGACCACCTAACTCCGGAGCCAAACACATGGCATATAACTATCAAGATCTTGTCTTTGCGCCTTATGG  
ACAACGATGGAGAATGTTGAGGAAGATTAGTTCTGTTTCATTTATTTTCAGCTAAAGCTCTTGAAGATTTCA  
AACATGTTTCGACAGGAAGAGGTTGGAACACTCATGCGCGAGCTAGCGCGTGCAAACACGAAACCAAGTGA  
ACCTAGGCCAGTTGGTAAACATGTGCGTACTCAACCGCTTGGACGAGAGATGATCGGACGGCGACTGTT  
CGGCGCCGATGCCGATCACAAGCGGAGGAGTTTCGATCAATGGTCACAGAAATGATGGCTCTCGCCGG  
AGTATTCAACATCGGAGATTTTCGTGCCCCGACTTGATTGTTTAGATTTACAAGGCGTCGCTGGTAAAATG  
AAACGTCTACACAAGAGGTTTCGACGCTTTTCTATCGTCGATCTTGGAAGAGCACGAGACGATGAAGAAC  
GGCCAGGATCAAAAGCACACGGACATGCTTAGCACTTTAATCTCGCTTAAGGGAACGATTTTGACGGTG  
AGGGTGAACCTCTAACGGATACTGAGATCAAAAGCCTTGCTATTGAACATGTTTACGGCCGGAACGACAC  
GTCAGCAAGTACGGTGGACTGGGCCATAGCTGAATTAATCCGTCACCCGGAATAATGAGAAAAGCCCA  
AGAAGAGCTTGATTCCGTCGTGCGGACGTGGAAGGCCCATTAACGAGTCGGACCTTTCTCAGCTTCCTTAC  
CTTCAGGCGGTTATCAAAGAGAATTCAGGCTCCATCCACCAACACCACTCTCGTTACCACACATCGCAT  
CAGAGAGCTGTGAGATCAACGGCTATCATATCCCCAAAGGATCAACCTTTTAAACAAACATATGGGCCAT  
AGCCCGTGACCCGGACCAATGGACCGACCGTTATCGTTTCGACCCGAGAGATTTTTACCCGGTGGTGAA  
AAAGCCGCGCTTGATGTGAAAGGAAACGACTTCGAGCTTATACCGTTCGGAGCCGGGAGGAGATCTGC  
GCCGGTTGAGTTTAGGGCTACGGACGATTACGTTACTGACGGCGACGCTTGTTACCGGATTTGAATGGG  
AACTGGCCGGAGGAGTTACGCCGGAGAAGCTCAACATGGAGGAGACTTATGGGATTACTCTACAAAGAG  
CGGTTCTTTGGTTGTGCATCCTAAGCCAAGGTTGGATATGAGTGATTACGGACTCGGGTCGGCTTAAAA  
CCTTTGCTTGATGATAAGCTAGGTCTTGACCGGTGGAAGGATCCCGGGCCCGTCGACTGCAGAGGC

>Promoter sequences of BT 126 and SN 60

GTCGCATGTGTTATGAATTTGTTTATTTTCTTTTTTGACGAATTATTTCTCTAATTTTCCTTATCTCTTTC  
AGTATTCTCCCCTAAAACGTTTCTAGCCATTTTAAATATAAAATATTTTTTGACTAAAAGATAAGTTGAAA  
ATTACAATATAGTAAAAATTACGCCAACATTTATTGACGAATATAAACGATTACAACGTGTTGGTGCAGA  
AAACACAGCATGCTGTAAATATCTACACTAGGCGATAAATCTTATGGGACTATATAAACAAACATGTTGA  
ATCTTGAAAACATTGTGTAATGGTTTTTGGATAAGTCTTTAATGGATAGATTAATAGAAGAAAAATAAAA  
CCTAAAGGCAAATAACACCGTTGTAACTATATAATAAGTTGGTTACGATGTCCCATGGTGGAATAAAAA  
GAAGATTAGCAGCATATAGAGTGTGTTTTGGAAGGATAAAATCTTTGCTCATCATCCACTTTTAGTG  
CCTTTTAAATCAAAATCATGTCCCATGGTCAAATATCGGGGTCAGGAGAATGGTCTAGTATATTTTATA  
GTTAGGATCGGATGATCTTCTAACTTATTCTAGTGTGTTGCTTACAAAAAATAATCCGATATTACGTCTT  
TTTTTTACGAACGACTCTATAGAGATATTTAGCTACCTTCCAAGTTTACCAATCAAACCTCACGAACCAG  
AAACCTCACCTACCAGTCGACCCTGCCCTCTCTCGCCTCCAACCTTTCCAACGTAAATAAATGCATTGATGT  
TTTTCTCTATAATATTCGTATATTCCAAGTCGTGTGGTGGGATACATATAGAAAAACCTAAATCTTATTAT  
ATTAGTATATACTGTTATAGAATTTACAATGTCTCGTTATTATTTTAAGATACCAGAGTACATCAGGACAA

AGAGTTGTGGACCAGTAGCCATAGTGCCTTGGTTGTATCTTCGTCACGGAGAGTCGAGCCCCCTTCCCTTTG  
TGTGGGATGATAAATGGGGTTTCCTAGGTGGTATCTGTATGCTATTACCTGATTATATCCTTAACCTCGTAT  
ACAAGCCACGTACACTAATTTTAAATTCAGCTCATTATCCGATTTTTGTATATATCAAAAGAAATTTATGTC  
TTTGACTAACCTAACGGTGCAAGCTGGGTGGTGAAGTGTCAATCTAAACCTCATGATGACATACATTTGT  
AGATTAACTATATTCTCACCCGAACCTTGGAAACGCTGTACATTTTGAAGTAAAAAAGCTGTTTCGATGA  
TGTGGGAGCTCCACTGATATGTTCTTAGTTGTTCCGTAAGTCTAGTATTTCAAACCCAGAGACGGATAGCA  
TTTAAGGAAGAAAATTTCTTCTCTTCATATAAAACAGAACATTATAAAAGAAGTAGGTGCTCAGGACTC  
GCGTAGATATGCACATGTGTATATATATATATATATATGTATGTAAAAGTATATAAAGGTGCTGATAA  
ATATATAAACATATTATAATAACATTAATAAATATTTTTGTTCAAAAATACACATAAAAAGATAAAATTTCTT  
AAAAACAACATTAACATAAAAAAATAAAAAACAACCTTATTTATATTATAGGTTTAATAAATTATAATTTAA  
TATTTATGAGGTGAGATTAGCTGATTAGGCATGTAAAAAAGATTAGAGTTTGAATTTAGGATTTAAAT  
AATTTTAATCATTTTACCATTAACTAATGTTGTATTATTTTTTTCTTTGTATGCTACTTTGGCATAATTTT  
TTTTTGTGATATCCAAACATTTGCCCATATGTATACTTGTTTTAAATCCTGATAATCATTTTCCGAATTAA  
AACTAAAATCATTTATATTACATTAGTTAATTTATAAAAGTTTTAATGTTTCGAAACACATATAAAGCCAT  
AAGCTAAAAAATTTATCCGACACCGAACCCTACTAGCCGTATCATAAATATGAGAACTAGGCTTAGAT  
CAGTAATTATTTTTAAACCAATTTATACCTAACCGAAACATGCATGGAATTGTCAAGAAAAAATAACCT  
TTATCTTATATATATAGCATATATGATTCCCATTCCTCATTCTCACTTACCATTCAAACCCACCACT
