# Supplementary material
Source: MDPI journal article supplement (https://www.mdpi.com/2311-7524/7/8/246)
Supplement: s1 [file s1]

**Table S2.** Quantitative trait loci ( $P < 0.05$ ) associated with anthocyanin biosynthesis in F3 population

| <b>Chromosome</b> | <b>Start</b> | <b>End</b> | <b>LOD</b> | <b>PVE(%)</b> | <b>Add</b> | <b>Dom</b> |
|-------------------|--------------|------------|------------|---------------|------------|------------|
| 9                 | SNP10        | SNP11      | 4.4547     | 1.5449        | -0.3138    | -0.2483    |
| 9                 | SNP22        | SNP23      | 95.4399    | 48.2638       | -1.3417    | 1.5829     |
