# Supplementary material
Source: MDPI journal article supplement (https://www.mdpi.com/2311-7524/7/8/246)
Supplement: s1 [file s1]

**Table S1.** SNPs genetically mapped on chromosome 7 and 9 used for anthocyanin biosynthesis targeted QTL-seq in broccoli.

| SNP IDs | Desi chromosomes | Physical positions (bp) | SNPs | Upstream 50-bp flanking sequences/Forward primers (5'-3') | Downstream 50-bp flanking sequences/Forward primers (5'-3') | Genetic position (cM) |
|---------|------------------|-------------------------|------|-----------------------------------------------------------|-------------------------------------------------------------|-----------------------|
| SNP1    | Chr07            | 36784249                | A/G  | TCTTGTCTGGAGGATATCAATATATACAAATAT<br>TTACCATATTTGAGTTA    | TGTGCTTAAGCGCCTGCAAAGACAACCTCTTCCTT<br>TACAGCAACTCGAAT      | 0                     |
| SNP2    | Chr07            | 43705152                | C/G  | TGTTACGCAGCTCACCATTTTTGATAAATCTTT<br>CGTTGATGAGTAAGTGA    | TCTTGCTCGGCAATACGGGATCCAAGGGTCCTTGG<br>AGTCTTTATATAATA      | 16.43                 |
| SNP3    | Chr07            | 43705160                | C/A  | AGCTCACCATTTTTGATAAATCTTTGTTGATG<br>AGTAAGTGACTCTTGCT     | GGCAATACGGGATCCAAGGGTCCTTGGAGTCTTTA<br>TATAATAAGCAAGCA      | 16.43                 |
| SNP4    | Chr07            | 43705164                | A/G  | CACCATTTTTGATAAATCTTTGTTGATGAGTA<br>AGTGACTCTTGCTCGGC     | ATACGGGATCCAAGGGTCCTTGGAGTCTTTATATA<br>ATAAGCAAGCATTTA      | 16.43                 |
| SNP5    | Chr09            | 46217406                | A/G  | GTGATATCTGATAGGATAAACTAATTTTATCATT<br>TAATAGGCTTTTCATTG   | ATCCCAATTATAAACTTGTCCATGATCAACACAAA<br>TACGTGGATAATGGT      | 0                     |
| SNP6    | Chr09            | 47364181                | C/G  | CGTCGGATCTACCGGATCCGCCCTTCCTCCCC<br>CGCCGTGATCCTTCTTT     | AAGAGATTCTCCAGATGCACCTCTACGAGTCCTGC<br>CCTTACCTGAAGTTC      | 9.18                  |
| SNP7    | Chr09            | 47601881                | A/T  | ACATGGGAATCGTTCTCTTGTCTCATTCCACAC<br>TTGTATAATATTATAAA    | ACAGACAAGTTGCAAGTATTATTACCGTTAATAC<br>TCATCCAAACACAAC       | 9.91                  |
| SNP8    | Chr09            | 47601895                | A/G  | CTCTTGCTCATTCACACTTGTATAATATTATA<br>AAAACAGACAAGTTGC      | AGTATTATTCACCGTTAATACTCATCCAAACACAA<br>CTCTCTCTTTCAA        | 9.91                  |
| SNP9    | Chr09            | 47601908                | C/A  | CCACACTTGTATAATATTATAAAAACAGACAA<br>GTTGCAAGTATTATTCAC    | GTTAATACTCATCCAAACACAACCTCTCTCTTTTC<br>AATCTTGAGTACAGA      | 9.91                  |
| SNP10   | Chr09            | 48192458                | A/C  | TCTCTCCACTGTACTTGTGAATGAACAGGACC<br>TGTTGACGAAATGCGTC     | AAGAGAGGATAGGCAATAACGAGTCAAGATCTAA<br>GCTATACGTATAAGGT      | 12.29                 |
| SNP11   | Chr09            | 49432505                | T/C  | CAGTTGCTTCTCCTCTACGTTATTGTAACACCT<br>TGAAGAAGAATCAAACG    | CAACATGAAGTGATCAAGAATCCTCTGGACAGAG<br>TCAATATCATAGAGTG      | 17.93                 |
| SNP12   | Chr09            | 49432712                | C/T  | GTGCAGAACCATCGATGTCCTAAGAAGCCTG<br>AGCAAGAACCTCGTCGAAG    | AACGCGTTTTTCGCTAGGTAACAGCTCCACGATTT<br>CTTCGAGTAGACTTC      | 17.93                 |
| SNP13   | Chr09            | 50760230                | C/T  | CTTTTGTATGTAATATAATCTTCTTTTCTTT<br>CTTGCTCTTTTTTTT        | CCTTCAAAACTTTAGAACTTGTTTTGTTTTCGTG<br>GTGCTTCTTCCCAT        | 26.07                 |
| SNP14   | Chr09            | 50817671                | T/A  | GTAGTCCATTATCGATCTCGGTGCCTCCAAAT<br>CCATTCCCTTTACCGAG     | CACCAAGCAAGCTTTGCATCTTGTCTCAAATATC<br>TCATCTAAACCTGC        | 26.07                 |
| SNP15   | Chr09            | 51167904                | G/A  | TTGTCTCAGATGGTCTCGACCCTTTTTATAACA                         | CCATGTGTGTCTCTACAACCTTGGTATTAGCAGGTC                        | 27.70                 |

|       |       |          |     |                                                        |                                                        |       |
|-------|-------|----------|-----|--------------------------------------------------------|--------------------------------------------------------|-------|
|       |       |          |     | CTGACACAGCGAAGAAT                                      | GGTTTAGTAGGGATG                                        |       |
| SNP16 | Chr09 | 51686791 | A/G | CGCAGCTGGTGCAGATAAGGACGAACTTACA<br>AGACTTAGAGAGCAAGTGA | TGACTTGCAGACGAACTATCAGAGAAAGAAGA<br>GGTTTTAAAGTCGGTGG  | 32.32 |
| SNP17 | Chr09 | 51694171 | G/T | AGAGAACTGATCATATGTATTTGATATGGCGAT<br>TTTAGGGTGTTTTGGAA | CGGAAAATTTATATTTTCAAGATGGAACCTGAAGA<br>AGCACATGAGACGTC | 32.50 |
| SNP18 | Chr09 | 51694179 | T/A | GATCATATGTATTTGATATGGCGATTTTAGGGT<br>GTTTTGGAAGCGGAAAA | TTATATTTTCAAGATGGAACCTGAAGAAGCACATG<br>AGACGTCTAATGTGG | 32.50 |
| SNP19 | Chr09 | 51712802 | T/C | ATAACTCGACTGAACTGAAATGACTCAAACA<br>AAATCAAATTAACCAAAC  | GGAATAAAAACCGAACAACATAAAAACAAACC<br>CGAACTAAAACCGAAAA  | 32.50 |
| SNP20 | Chr09 | 51713995 | A/C | TTTGAGCAATGAGTTATAATTGAAATATTGGT<br>AAGATCAGGTAAGTTCC  | AATTATTACTTTGGACGAGTATATAGCAATAGCACT<br>GGATGCAACTAGAG | 32.50 |
| SNP21 | Chr09 | 51715535 | G/T | TCTTCTCCTTCTTCTCGTCGCTCAAACCAAGT<br>AGATCTTGACGGTTGAA  | AAATTAACATCCTCTGAAGTTCTTGAGGAAGCCTT<br>TCTGTAATCTTTATG | 32.50 |
| SNP22 | Chr09 | 51716244 | A/T | TCTCAATGTTGGACGAGTTCATGTTGATCTGTA<br>GCCTTTCCAGTTCAGCT | CAAGCTCTGCTTCGATTTACCAATAAATTCTGAA<br>TTCCCTGCTGTCTTT  | 32.50 |
| SNP23 | Chr09 | 51788927 | A/G | AAAACAAGTATCAGACGAGAATAATCTGCTTG<br>TTGCTTGACTAAATCGAC | GTTTGGATCCCATCGAATGGCGATGTTCCGTCGCT<br>TATTCTACAAAAAGC | 33.22 |
| SNP24 | Chr09 | 51877253 | C/G | AAACGTCTTCTTGATGTGCCCTGAGTCAACGC<br>AAGTCACTGAAACCTCCG | ATCAACCGCATCCATCACCGTGTTATCATCAGCCT<br>TCGACAGTATCTGCA | 35.40 |
| SNP25 | Chr09 | 52187758 | T/C | CTTCTTCTTATCACTCATGATAGCAAGTAACTA<br>CATGTAAGTTCCACTCT | ACTTTACTGTATTTACGAGTTCTTCGTTTTTGATAT<br>GTAATCATCTCGT  | 36.86 |
| SNP26 | Chr09 | 52600419 | A/G | GGGGAACTCTCTACCTCTTCCTTCCTTCTCAG<br>AGAGAGAGAGAAGAGAG  | GAACAGTGAGAAATAAATAAATAATTATTATTATT<br>TTGAATTAAATTAA  | 38.31 |
